# Supplementary material
Source: publisher site journal article supplement (https://www.spandidos-publications.com/3892/downloadSupplementary)
Supplement: Supplementary file 1 [file downloadSupplementary]

Figure S1. Genomic distribution of CNVs detected in the present study, among all the individuals analysed. Chromosomal regions for CNVs detected in more one affected family member are marked. Blue indicates copy number gain; pink indicates copy number loss. CNVs, copy number variants; chr, chromosome.

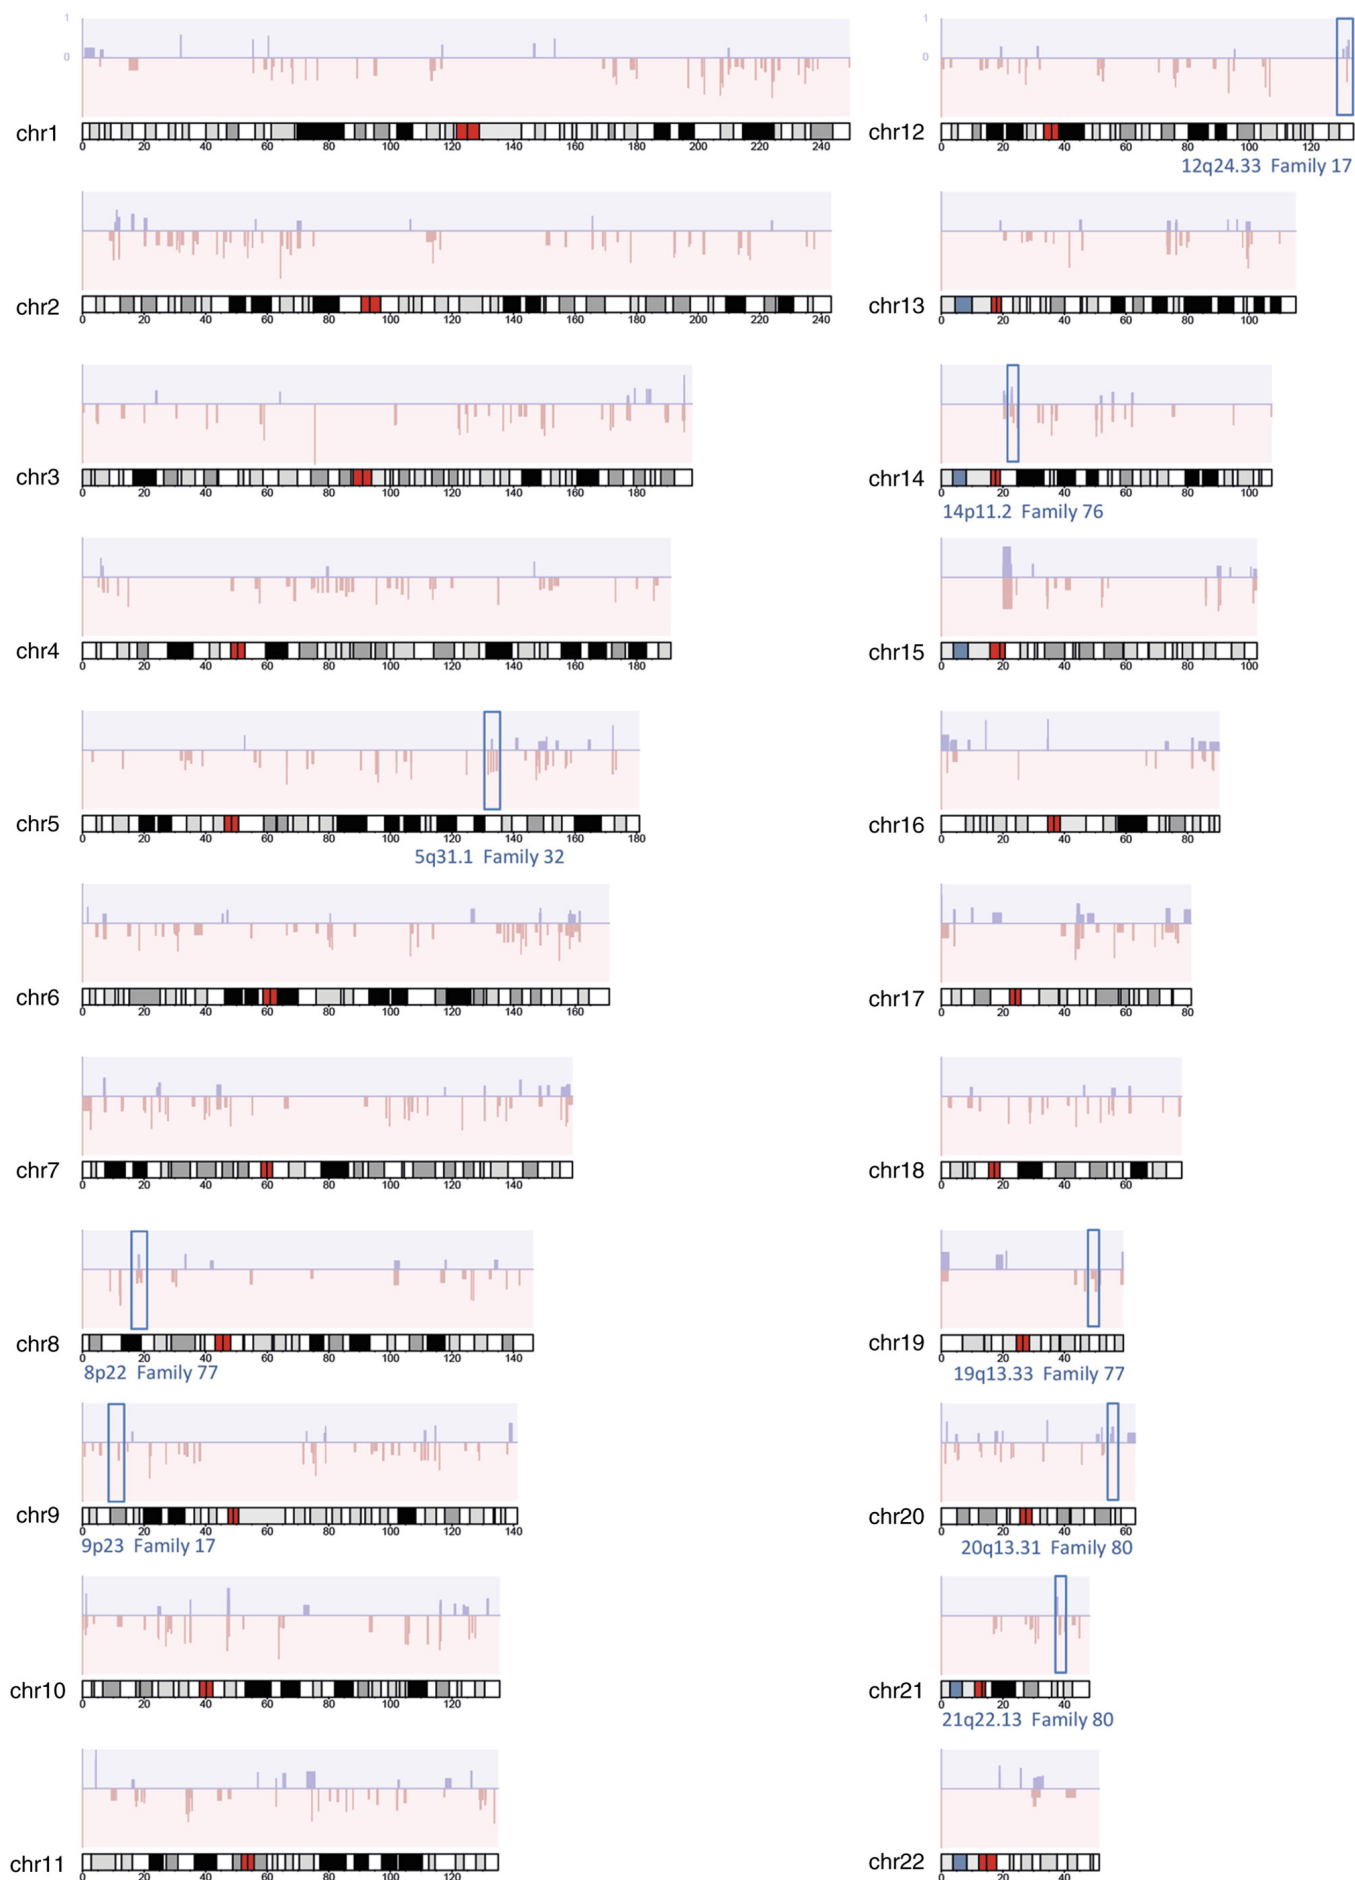

Table SI. Additional malformations of the UT and other organ systems.

| Family-individual | Anomaly UT              | Extra-renal anomaly                                |
|-------------------|-------------------------|----------------------------------------------------|
| 17-351            |                         | Scoliosis, MI, JIA, suspected Marfan syndrome      |
| 19-357            |                         | CP, diplegia, autism, mild intellectual disability |
| 32-667            |                         | VSD                                                |
| 32-395            | Bladder diverticula     |                                                    |
| 49-391            |                         | Epilepsy                                           |
| 49-604            | Bilateral-duplex kidney |                                                    |
| 76-648            | Bladder diverticula     |                                                    |
| 78-646            |                         | VSD, cerebral-, skeletal-, tracheal malformations  |
| 79-715            | Unilateral megaureter   |                                                    |
| 80-682            |                         | Epilepsy, ADHD, dyslexia                           |
| 82-705            | Bladder diverticula     |                                                    |
| 83-657            |                         | Ulcerative proctitis                               |

CP, cerebral palsy; JIA, juvenile idiopathic arthritis; MI, mitral insufficiency; UT, urinary tract; VSD, ventricular septal defect.

Table SII. CNV shared by two or more affected individuals within the families, detailing CNV locus and characteristics.

## A, Family 32

| Individual       | CNV position             |                  |                            |                    |                                |                         |
|------------------|--------------------------|------------------|----------------------------|--------------------|--------------------------------|-------------------------|
|                  | Genomic location         | Cytogenetic band | Duplication/deletion, log2 | Size of region, Mb | CNV region shared in family, % | Population frequency, % |
| 656 <sup>a</sup> | Chr5:132581687-132690433 | 5q31.1           | -0.518                     | 0.108              | 87                             | 0.02                    |
| 395 <sup>a</sup> | Chr5:132596102-132690433 |                  | -0.554                     | 0.094              | 100                            |                         |
| 236 <sup>a</sup> | Chr5:132596102-132690433 |                  | -0.513                     | 0.094              | 100                            |                         |

## B, Family 77

| Individual       | CNV position           |                  |                            |                    |                                |                         |
|------------------|------------------------|------------------|----------------------------|--------------------|--------------------------------|-------------------------|
|                  | Genomic location       | Cytogenetic band | Duplication/deletion, log2 | Size of region, Mb | CNV region shared in family, % | Population frequency, % |
| 645 <sup>a</sup> | Chr8:18100755-18457679 | 8p22             | 0.368                      | 0.356              | 70                             | 0.02-0.15               |
| 690 <sup>a</sup> | Chr8:18188774-18437512 |                  | 0.288                      | 0.248              | 100                            |                         |

## C, Family 17

| Individual       | CNV position           |                  |                            |                    |                                |                         |
|------------------|------------------------|------------------|----------------------------|--------------------|--------------------------------|-------------------------|
|                  | Genomic location       | Cytogenetic band | Duplication/deletion, log2 | Size of region, Mb | CNV region shared in family, % | Population frequency, % |
| 347 <sup>a</sup> | Chr9:11647401-11913220 | 9p23             | -0.449                     | 0.27               | 96                             | 0.02-0.24               |
| 351 <sup>a</sup> | Chr9:11647401-11901376 |                  | -0.45                      | 0.25               | 100                            |                         |

## D, Family 17

| Individual       | CNV position              |                  |                            |                    |                                |                         |
|------------------|---------------------------|------------------|----------------------------|--------------------|--------------------------------|-------------------------|
|                  | Genomic location          | Cytogenetic band | Duplication/deletion, log2 | Size of region, Mb | CNV region shared in family, % | Population frequency, % |
| 347 <sup>a</sup> | Chr12:131734725-131813804 | 12q24.33         | -0.59                      | 0.079              | 100                            | 0.61-1.0                |
| 351 <sup>a</sup> | Chr12:131734725-131813804 |                  | -0.605                     | 0.079              | 100                            |                         |

## E, Family 76

| Individual       | CNV position             |                  |                            |                    |                                |                         |
|------------------|--------------------------|------------------|----------------------------|--------------------|--------------------------------|-------------------------|
|                  | Genomic location         | Cytogenetic band | Duplication/deletion, log2 | Size of region, Mb | CNV region shared in family, % | Population frequency, % |
| 644              | Chr14:22653758-23029819  | 14q11.2          | 0.247                      | 0.376              | 39                             | 0.02-0.59               |
| 653              | Chr14:22737977-23029875  |                  | 0.359                      | 0.291              | 50                             |                         |
| 660 <sup>a</sup> | Chr14:22855145-23000062  |                  | 0.439                      | 0.144              | 100                            |                         |
| 650 <sup>a</sup> | Chr14: 22487698-23029819 |                  | 0.171                      | 0.54               | 27                             |                         |

## F, Family 77, affected members

| Individual       | CNV position            |                  |                            |                    |                                |                         |
|------------------|-------------------------|------------------|----------------------------|--------------------|--------------------------------|-------------------------|
|                  | Genomic location        | Cytogenetic band | Duplication/deletion, log2 | Size of region, Mb | CNV region shared in family, % | Population frequency, % |
| 645 <sup>a</sup> | Chr19:48715269-50281369 | 19q13.33         | -0.221                     | 1.566              | 18                             | 1                       |

Table SII. Continued.

## F, Family 77, affected members

| Individual       | CNV position            |                     | Duplication/<br>deletion, log2 | Size of<br>region, Mb | CNV region shared<br>in family, % | Population<br>frequency, % |
|------------------|-------------------------|---------------------|--------------------------------|-----------------------|-----------------------------------|----------------------------|
|                  | Genomic location        | Cytogenetic<br>band |                                |                       |                                   |                            |
| 690 <sup>a</sup> | Chr19:49998299-50506366 |                     | -0.55                          | 0.508                 | 56                                |                            |

## G, Family 80

| Individual       | CNV position            |                     | Duplication/<br>deletion, log2 | Size of<br>region, Mb | CNV region shared<br>in family, % | Population<br>frequency, % |
|------------------|-------------------------|---------------------|--------------------------------|-----------------------|-----------------------------------|----------------------------|
|                  | Genomic location        | Cytogenetic<br>band |                                |                       |                                   |                            |
| 652 <sup>a</sup> | Chr20:54967565-55918939 | 20q13.31            | 0.214                          | 0.951                 | 18                                | 0.02                       |
| 695              | Chr20:55402690-55919277 |                     | 0.398                          | 0.508                 | 56                                |                            |

## H, Family 80

| Individual       | CNV position            |                     | Duplication/<br>deletion, log2 | Size of<br>region, Mb | CNV region shared<br>in family, % | Population<br>frequency, % |
|------------------|-------------------------|---------------------|--------------------------------|-----------------------|-----------------------------------|----------------------------|
|                  | Genomic location        | Cytogenetic<br>band |                                |                       |                                   |                            |
| 658 <sup>a</sup> | Chr21:38260090-38712209 | 21q22.13            | -471                           | 0.452                 | 70                                | 0.37-0.48                  |
| 682 <sup>a</sup> | Chr21:38399356-38784624 |                     | -312                           | 0.385                 | 81                                |                            |
| 652 <sup>a</sup> | Chr21:37803667-41148845 |                     | 0.104                          | 3.345                 | 10                                | 0.02                       |

<sup>a</sup>Affected family members. CNV, copy number variants. CNVs with different genomic locations in the same family are presented separately.
